# Supplementary material for: DNA Barcoding Reveals Limited Accuracy of Identifications Based on Folk Taxonomy
Source: PLoS One. 2014 Jan 8;9(1):e84291. doi: 10.1371/journal.pone.0084291 (PMC3885563; doi:10.1371/journal.pone.0084291)
Supplement: Data S1 — Genbank BLAST identification of root product complexes and associated BOLD identification numbers. (XLSX) [file pone.0084291.s001.xlsx]

## Sheet: S2
Data S1. Genbank BLAST identification of root product complexes and associated BOLD identification numbers
Sample			Blast results
#	Marker	BOLD-ID*	Accession	Species	E-value	Max score
A01	trnH-psbA	-	-	-	-	-
	rpoC1	-	-	-	-	-
	ITS	RCMM-A01	HE602443.1	Daucus crinitus	0	953
A01		Putative ID	Daucus crinitus Desf.
A02	trnH-psbA	-	-	-	-
	rpoC1	-	-	-	-
	ITS	RCMM-A02	HE602443.1	Daucus crinitus	0	1099
A02		Putative ID	Daucus crinitus Desf.
A03	trnH-psbA	-	-	-	-	-
	rpoC1	-	-	-	-	-
	ITS	RCMM-A03	HE602443.1	Daucus crinitus	0	1101
A03		Putative ID	Daucus crinitus Desf.
A04	trnH-psbA	RCMM-A04	EU531684.1	Daucus crinitus	9e-160	571
	rpoC1	RCMM-A04	EU531580.1	Daucus crinitus	0	900
	ITS	RCMM-A04	HE602443.1	Daucus crinitus	0	1103
A04		Putative ID	Daucus crinitus Desf.
A05	trnH-psbA	-	-	-	-	-
	rpoC1	-	-	-	-	-
	ITS	-	-	-	-	-
A05		Putative ID	Failed
A06	trnH-psbA	RCMM-A06	EU531684.1	Daucus crinitus	3e-129	470
	rpoC1	RCMM-A06	EU531580.1	Daucus crinitus	0	804
	ITS	RCMM-A06	HE602443.1	Daucus crinitus	0	1109
A06		Putative ID	Daucus crinitus Desf.
A07	trnH-psbA	-	-	-	-	-
	rpoC1	-	-	-	-	-
	ITS	RCMM-A07	HE602374.1	Foeniculum vulgare	0	1033
			HE602455.1	Anethum foeniculoides	0	1033
A07		Putative ID	Foeniculum vulgare Mill.
A08	trnH-psbA	-	-	-	-	-
	rpoC1	-	-	-	-	-
	ITS	-	-	-	-	-
A08		Putative ID	Failed
A09	trnH-psbA	-	-	-	-	-
	rpoC1	-	-	-	-	-
	ITS	RCMM-A09	HE602443.1	Daucus crinitus	0	1098
A09		Putative ID	Daucus crinitus Desf.
A10	trnH-psbA	-	-	-	-	-
	rpoC1	RCMM-A10	EU531580.1	Daucus crinitus	0	900
	ITS	RCMM-A10	HE602443.1	Daucus crinitus	0	1118
A10		Putative ID	Daucus crinitus Desf.
A11	trnH-psbA	-	-	-	-	-
	rpoC1	RCMM-A11	EU531580.1	Daucus crinitus	0	900
	ITS	-	-	-	-	-
A11		Putative ID	Daucus crinitus Desf.
A12	trnH-psbA	RCMM-A12	EU531684.1	Daucus crinitus	6e-121	442
	rpoC1	RCMM-A12	EU531580.1	Daucus crinitus	0	893
	ITS	RCMM-A12	HE602443.1	Daucus crinitus	0	1103
A12		Putative ID	Daucus crinitus Desf.
A13	trnH-psbA	RCMM-A13	EU531684.1	Daucus crinitus	3e-114	420
	rpoC1	RCMM-A13	EU531580.1	Daucus crinitus	0	900
	ITS	RCMM-A13	HE602443.1	Daucus crinitus	0	1118
A13		Putative ID	Daucus crinitus Desf.
A14	trnH-psbA	RCMM-A14	EU531684.1	Daucus crinitus	5e-157	562
	rpoC1	-	-	-	-	-
	ITS	RCMM-A14	HE602443.1	Daucus crinitus	0	1092
A14		Putative ID	Daucus crinitus Desf.
A15	trnH-psbA	RCMM-A15	EU531684.1	Daucus crinitus	3e-150	540
	rpoC1	RCMM-A15	EU531580.1	Daucus crinitus	0	900
	ITS	-	-	-	-	-
A15		Putative ID	Daucus crinitus Desf.
A16	trnH-psbA	RCMM-A16	HE659548.1	Thapsia transtagana	2e-84	320
	rpoC1	RCMM-A16	EU531577.1	Thapsia transtagana	0	894
			EU531578.1	Thapsia platycarpa	0	894
			EU531575.1	Thapsia garganica	0	894
	ITS	-	-	-	-	-
A16		Putative ID	Thapsia transtagana Brot.
A17	trnH-psbA	RCMM-A17	HE659548.1	Thapsia transtagana	8e-68	265
	rpoC1	RCMM-A17	EU531577.1	Thapsia transtagana	0	900
			EU531578.1	Thapsia platycarpa	0	900
			EU531575.1	Thapsia garganica	0	900
	ITS	RCMM-A17	FJ415146.1	Thapsia garganica	1e-179	638
			HE602372.1	Thapsia transtagana	1e-179	638
A17		Putative ID	Thapsia transtagana Brot.
A18	trnH-psbA	-	-	-	-	-
	rpoC1	RCMM-A18	EU531577.1	Thapsia transtagana	0	900
			EU531578.1	Thapsia platycarpa	0	900
			EU531575.1	Thapsia garganica	0	900
	ITS	RCMM-A18	HE602372.1	Thapsia transtagana	0	1096
A18		Putative ID	Thapsia transtagana Brot.
A19	trnH-psbA	-	-	-	-	-
	rpoC1	RCMM-A19	EU531577.1	Thapsia transtagana	0	835
			EU531578.1	Thapsia platycarpa	0	835
			EU531575.1	Thapsia garganica	0	835
	ITS	RCMM-A19	HE602372.1	Thapsia transtagana	0	1096
A19		Putative ID	Thapsia transtagana Brot.
A20	trnH-psbA	-	-	-	-	-
	rpoC1	-	-	-	-	-
	ITS	-	-	-	-	-
A20		Putative ID	Failed
K01	trnH-psbA	-	-	-	-	-
	rpoC1	-	-	-	-	-
	ITS	-	-	-	-	-
K01		Putative ID	Failed
K02	trnH-psbA	-	-	-	-	-
	rpoC1	RCMM-K02	EU531577.1	Thapsia transtagana	0	797
			EU531578.1	Thapsia platycarpa	0	797
			EU531575.1	Thapsia garganica	0	797
			EU531583.1	Daucus durieua	0	797
	ITS	-	-	-	-	-
K02		Putative ID	Thapsia sp.
K03	trnH-psbA	RCMM-K03	HE659549.1	Thapsia platycarpa	4e-87	329
	rpoC1	RCMM-K03	EU531577.1	Thapsia transtagana	0	900
			EU531578.1	Thapsia platycarpa	0	900
			EU531575.1	Thapsia garganica	0	900
	ITS	-	-	-	-	-
K03		Putative ID	Thapsia platycarpa Pomel
K04	trnH-psbA	-	-	-	-	-
	rpoC1	-	-	-	-	-
	ITS	-	-	-	-	-
K04		Putative ID	Failed
K05	trnH-psbA	RCMM-K05	HE659548.1	Thapsia transtagana	1e-101	377
	rpoC1	RCMM-K05	EU531577.1	Thapsia transtagana	0	900
			EU531578.1	Thapsia platycarpa	0	900
			EU531575.1	Thapsia garganica	0	900
	ITS	-	-	-	-	-
K05		Putative ID	Thapsia transtagana Brot.
K06	trnH-psbA	RCMM-K06	HE659549.1	Thapsia platycarpa	6e-106	392
	rpoC1	RCMM-K06	EU531577.1	Thapsia transtagana	0	900
			EU531578.1	Thapsia platycarpa	0	900
			EU531575.1	Thapsia garganica	0	900
	ITS	RCMM-K06	HE602372.1	Thapsia transtagana	0	1096
K06		Putative ID	Thapsia platycarpa Pomel
K07	trnH-psbA	-	-	-	-	-
	rpoC1	-	-	-	-	-
	ITS	-	-	-	-	-
K07		Putative ID	Failed
T01	trnH-psbA	RCMM-T01	GU818332.1	Anacyclus valentinus	0	905
	rpoC1	RCMM-T01	EU531592.1	Anacyclus pyrethrum	6e-136	492
			EU531593.1	Anacyclus radiatus	6e-136	492
			EU531595.1	Anacyclus homogamos	6e-136	492
			HQ594058.1	Matricaria discoidea	6e-136	492
			GQ436042.1	Achillea wilsoniana	6e-136	492
			FJ395791.1	Achillea millefolium	6e-136	492
	ITS	-	-	-	-	-
T01		Putative ID	Anacyclus valentinus L.
T02	trnH-psbA	RCMM-T02	GU818332.1	Anacyclus valentinus	0	824
	rpoC1	RCMM-T02	EU531593.1	Anacyclus radiatus	0	863
			EU531595.1	Anacyclus homogamos	0	863
	ITS	-	-	-	-	-
T02		Putative ID	Anacyclus valentinus L.
T03	trnH-psbA	RCMM-T03	GU818332.1	Anacyclus valentinus	0	828
	rpoC1	-	EU531592.1	Anacyclus pyrethrum	0	795
			EU531593.1	Anacyclus radiatus	0	795
			EU531595.1	Anacyclus homogamos	0	795
	ITS	-	-	-	-	-
T03		Putative ID	Anacyclus valentinus L.
T04	trnH-psbA	RCMM-T04	GU818332.1	Anacyclus valentinus	0	808
	rpoC1	RCMM-T04	EU531593.1	Anacyclus radiatus	0	863
			EU531595.1	Anacyclus homogamos	0	863
	ITS	-	-	-	-	-
T04		Putative ID	Anacyclus valentinus L.
T05	trnH-psbA	RCMM-T05	FJ493298.1	Plantago major	5e-129	470
	rpoC1	RCMM-T05	GQ249006.1	Plantago major	0	713
			GQ429105.1	Plantago australis	0	713
			EU750240.1	Plantago rugelii	0	713
	ITS	-	-	-	-	-
T05		Putative ID	Plantago sp.
T06	trnH-psbA	RCMM-T06	GU818332.1	Anacyclus valentinus	0	922
	rpoC1	RCMM-T06	EU531595.1	Anacyclus homogamos	2e-105	390
			EU531592.1	Anacyclus pyrethrum	2e-105	390
			EU531593.1	Anacyclus radiatus	2e-105	390
			HQ594058.1	Matricaria discoidea	2e-105	390
	ITS	-	-	-	-	-
T06		Putative ID	Anacyclus valentinus L.
T07	trnH-psbA	RCMM-T07	GU818332.1	Anacyclus valentinus	0	811
	rpoC1	RCMM-T07	EU531592.1	Anacyclus pyrethrum	0	704
			EU531593.1	Anacyclus radiatus	0	704
			EU531595.1	Anacyclus homogamos	0	704
	ITS	-	-	-	-	-
T07		Putative ID	Anacyclus valentinus L.
T08	trnH-psbA	RCMM-T08	GU818332.1	Anacyclus valentinus	0	808
	rpoC1	RCMM-T08	EU531592.1	Anacyclus pyrethrum	4e-97	363
			EU531593.1	Anacyclus radiatus	4e-97	363
			EU531595.1	Anacyclus homogamos	4e-97	363
	ITS	-	-	-	-	-
T08		Putative ID	Anacyclus valentinus L.
T09	trnH-psbA	RCMM-T09	GU818332.1	Anacyclus valentinus	0	798
	rpoC1	RCMM-T09	EU531592.1	Anacyclus pyrethrum	0	767
			EU531593.1	Anacyclus radiatus	0	767
			EU531595.1	Anacyclus homogamos	0	767
	ITS	-	-	-	-	-
T09		Putative ID	Anacyclus valentinus L.
T10	trnH-psbA	RCMM-T10	GU818332.1	Anacyclus valentinus	0	734
	rpoC1	RCMM-T10	EU531592.1	Anacyclus pyrethrum	0	804
			EU531593.1	Anacyclus radiatus	0	804
			EU531595.1	Anacyclus homogamos	0	804
	ITS	-	-	-	-	-
T10		Putative ID	Anacyclus valentinus L.
T11	trnH-psbA	RCMM-T11	EU531697.1	Scorzonera caespitosa	0	682
	rpoC1	RCMM-T11	GQ436238.1	Rehmannia glutinosa	1e-97	364
	ITS	-	-	-	-	-
T11		Putative ID	Scorzonera caespitosa Pomel
T12	trnH-psbA	RCMM-T12	GU818332.1	Anacyclus valentinus	0	680
	rpoC1	RCMM-T12	EU531595.1	Anacyclus homogamos	0	826
			EU531593.1	Anacyclus radiatus	0	826
	ITS	-	-	-	-	-
T12		Putative ID	Anacyclus valentinus L.
T13	trnH-psbA	RCMM-T13	GU818332.1	Anacyclus valentinus	0	811
	rpoC1	RCMM-T13	EU531592.1	Anacyclus pyrethrum	5e-105	388
			EU531593.1	Anacyclus radiatus	5e-105	388
			EU531595.1	Anacyclus homogamos	5e-105	388
	ITS	-	-	-	-	-
T13		Putative ID	Anacyclus valentinus L.
T14	trnH-psbA	RCMM-T14	EU531703.1	Carlina brachylepis	0	798
	rpoC1	RCMM-T14	EU531608.1	Carlina brachylepis	0	675
	ITS	-	-	-	-	-
T14		Putative ID	Carlina brachylepis (Batt.) Meusel & Kästner
T15	trnH-psbA	RCMM-T15	GU818332.1	Anacyclus valentinus	0	811
	rpoC1	RCMM-T15	EU531592.1	Anacyclus pyrethrum	2e-131	477
			EU531593.1	Anacyclus radiatus	2e-131	477
			EU531595.1	Anacyclus homogamos	2e-131	477
	ITS	-	-	-	-	-
T15		Putative ID	Anacyclus valentinus L.
T16	trnH-psbA	RCMM-T16	GU818332.1	Anacyclus valentinus	0	928
	rpoC1	RCMM-T16	EU531592.1	Anacyclus pyrethrum	0	782
			EU531593.1	Anacyclus radiatus	0	782
			EU531595.1	Anacyclus homogamos	0	782
	ITS	-	-	-	-	-
T16		Putative ID	Anacyclus valentinus L.
T17	trnH-psbA	-	-	-	-	-
	rpoC1	RCMM-T17	EU531595.1	Anacyclus homogamos	0	852
			EU531593.1	Anacyclus radiatus	0	852
	ITS	-	-	-	-	-
T17		Putative ID	Anacyclus sp.
T18	trnH-psbA	RCMM-T18	GU818332.1	Anacyclus valentinus	0	819
	rpoC1	RCMM-T18	EU531592.1	Anacyclus pyrethrum	0	699
			EU531593.1	Anacyclus radiatus	0	699
			EU531595.1	Anacyclus homogamos	0	699
	ITS	-	-	-	-	-
T18		Putative ID	Anacyclus valentinus L.
T19	trnH-psbA	RCMM-T19	GU818332.1	Anacyclus valentinus	0	917
	rpoC1	RCMM-T19	EU531592.1	Anacyclus pyrethrum	7e-115	422
			EU531593.1	Anacyclus radiatus	7e-115	422
			EU531595.1	Anacyclus homogamos	7e-115	422
	ITS	-	-	-	-	-
T19		Putative ID	Anacyclus valentinus L.
T20	trnH-psbA	RCMM-T20	GU818332.1	Anacyclus valentinus	0	811
	rpoC1	RCMM-T20	EU531595.1	Anacyclus homogamos	0	822
			EU531593.1	Anacyclus radiatus	0	822
	ITS	-	-	-	-	-
T20		Putative ID	Anacyclus valentinus L.
Z01	trnH-psbA	RCMM-Z01	EU531684.1	Daucus crinitus	2e-156	560
	rpoC1	RCMM-Z01	EU531580.1	Daucus crinitus	0	900
	ITS	RCMM-Z01	HE602443.1	Daucus crinitus	0	756
Z01		Putative ID	Daucus crinitus Desf.
Z02	trnH-psbA	RCMM-Z02	HE602490.1	Kundmannia sicula	4e-118	433
	rpoC1	RCMM-Z02	HE603102.1	Kundmannia sicula	0	835
	ITS	-	-	-	-	-
Z02		Putative ID	Kundmannia sicula (L.) DC.
Z03	trnH-psbA	RCMM-Z03	HE602485.1	Eryngium tricuspidatum	0	686
	rpoC1	RCMM-Z03	EU531583.1	Daucus durieua	0	850
	ITS	-	-	-	-	-
Z03		Putative ID	Apiaceae indet.
Z04	trnH-psbA	RCMM-Z04	EU531684.1	Daucus crinitus	2e-147	531
	rpoC1	RCMM-Z04	EU531580.1	Daucus crinitus	0	830
	ITS	RCMM-Z04	HE602443.1	Daucus crinitus	0	1112
Z04		Putative ID	Daucus crinitus Desf.
Z05	trnH-psbA	RCMM-Z05	HE602490.1	Kundmannia sicula	6e-95	355
	rpoC1	RCMM-Z05	HE603102.1	Kundmannia sicula	0	835
	ITS	RCMM-Z05	HE602465.1	Kundmannia sicula	3e-147	869
Z05		Putative ID	Kundmannia sicula (L.) DC.
Z06	trnH-psbA	RCMM-Z06	EU531684.1	Daucus crinitus	6e-131	475
	rpoC1	RCMM-Z06	EU531580.1	Daucus crinitus	0	815
	ITS	RCMM-Z06	HE602443.1	Daucus crinitus	0	1112
Z06		Putative ID	Daucus crinitus Desf.
Z07	trnH-psbA	-	-	-	-	-
	rpoC1	-	-	-	-	-
	ITS	-	-	-	-	-
Z07		Putative ID	Failed
*BOLD records can be retrieved by combining the BOLD Sample-ID with the barcode marker name
